# Supplementary material for: Direct printing of functional 3D objects using polymerization-induced phase separation
Source: PubMed Central journal article supplement (PMC7782741; doi:10.1038/s41467-020-20256-3), 2021-01-04
Supplement: 41467_2020_20256_MOESM3_ESM.pdf [file 41467_2020_20256_MOESM3_ESM.pdf]

## **Description of Additional Supplementary Files**

**Supplementary Movie 1:** Optical microscope capture of polymer network island growth of 15 wt % DA-170 resin.

**Supplementary Movie 2:** Optical microscope capture of polymer network island growth of 99 wt % DA-700 resin.

**Supplementary Movie 3:** Optical microscope capture of polymer network island growth of 99 wt % DA-700 resin with laser on time and sliced area highlighted.
